# Supplementary material
Source: publisher figshare collection journal article supplement (https://karger.figshare.com/ndownloader/files/7495813)
Supplement: Supplementary file 1 [file 7495813]

Supplementary Table 1. Backward regression analyses with neuropsychological tests as predictors and FDG PET ROIs in 62 MCI patients and 42 controls.

| FDG-PET | RAVLT delayed | | TMT B | | Composite | | Regression model | | |
| --- | --- | --- | --- | --- | --- | --- | --- | --- | --- |
|  | β | p. | β | p. | β | p. | R2 | F | p. |
| Inferior temporal* | - | - | **-** | **-** | **.356** | **.001** | **.127** | **12.907** | **.001** |
| Inferior parietal* | - | - | - | - | **.426** | **.000** | **.181** | **19.684** | **.000** |
| Posterior Cingulate* | **-** | **-** | **-** | **-** | **.364** | **.000** | **.133** | **13.613** | **.000** |
| Composite ROI | - | - | **-** | **-** | **.422** | **.000** | **.178** | **19.232** | **.000** |
